# Supplementary material
Source: publisher figshare collection journal article supplement (https://tandf.figshare.com/ndownloader/files/20999739)
Supplement: Supplementary file 1 [file 20999739]

SUPPORTING INFORMATION

**Fluorescent Macrocyclic Chemosensor for Zn(II) Detection at Alkaline pH Values**

Gianluca Ambrosi,a Mauro Micheloni,a Daniele Paderni,a Mauro Formica,a Luca Giorgi,a* Vieri Fusia*


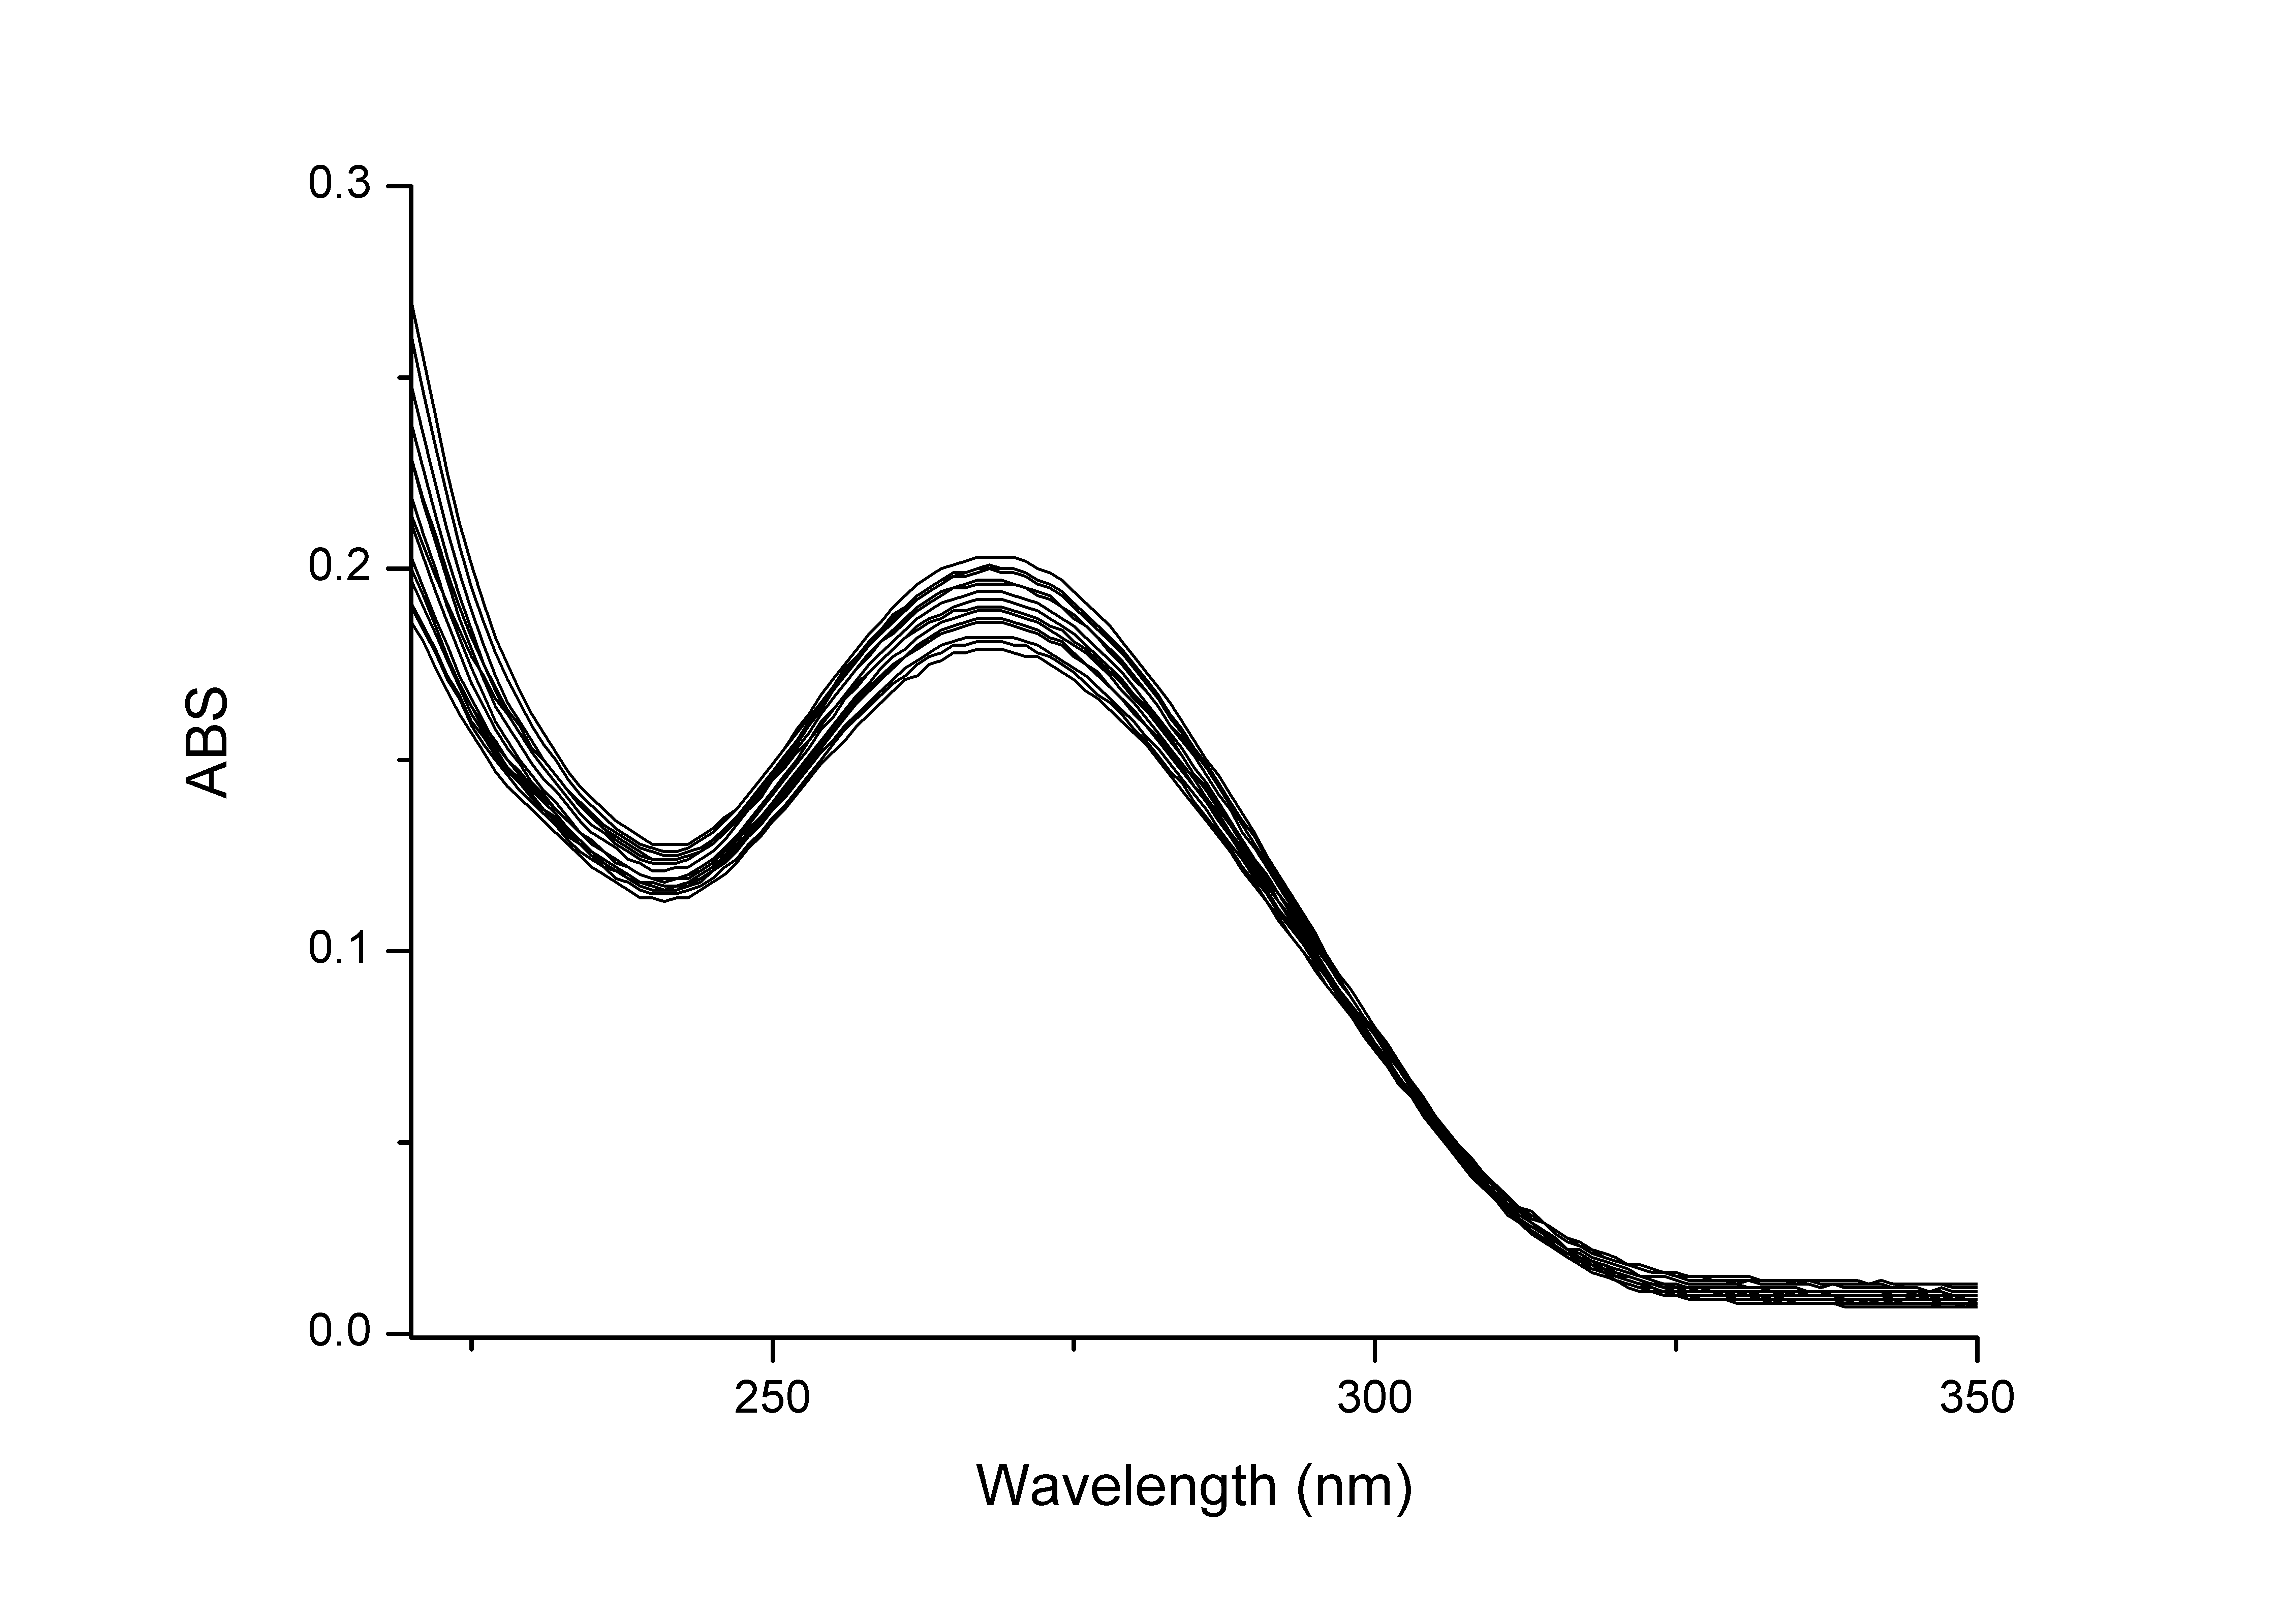


Figure S1. Absorption spectra of **L** registered in water/ethanol 99/1 v/v in the presence of HEPES buffer (10−3 mol dm−3) at pH = 7.0 by adding Zn(ClO4)2 up to 2 eq. ([L] = 1.5·10−5 mol dm−3)


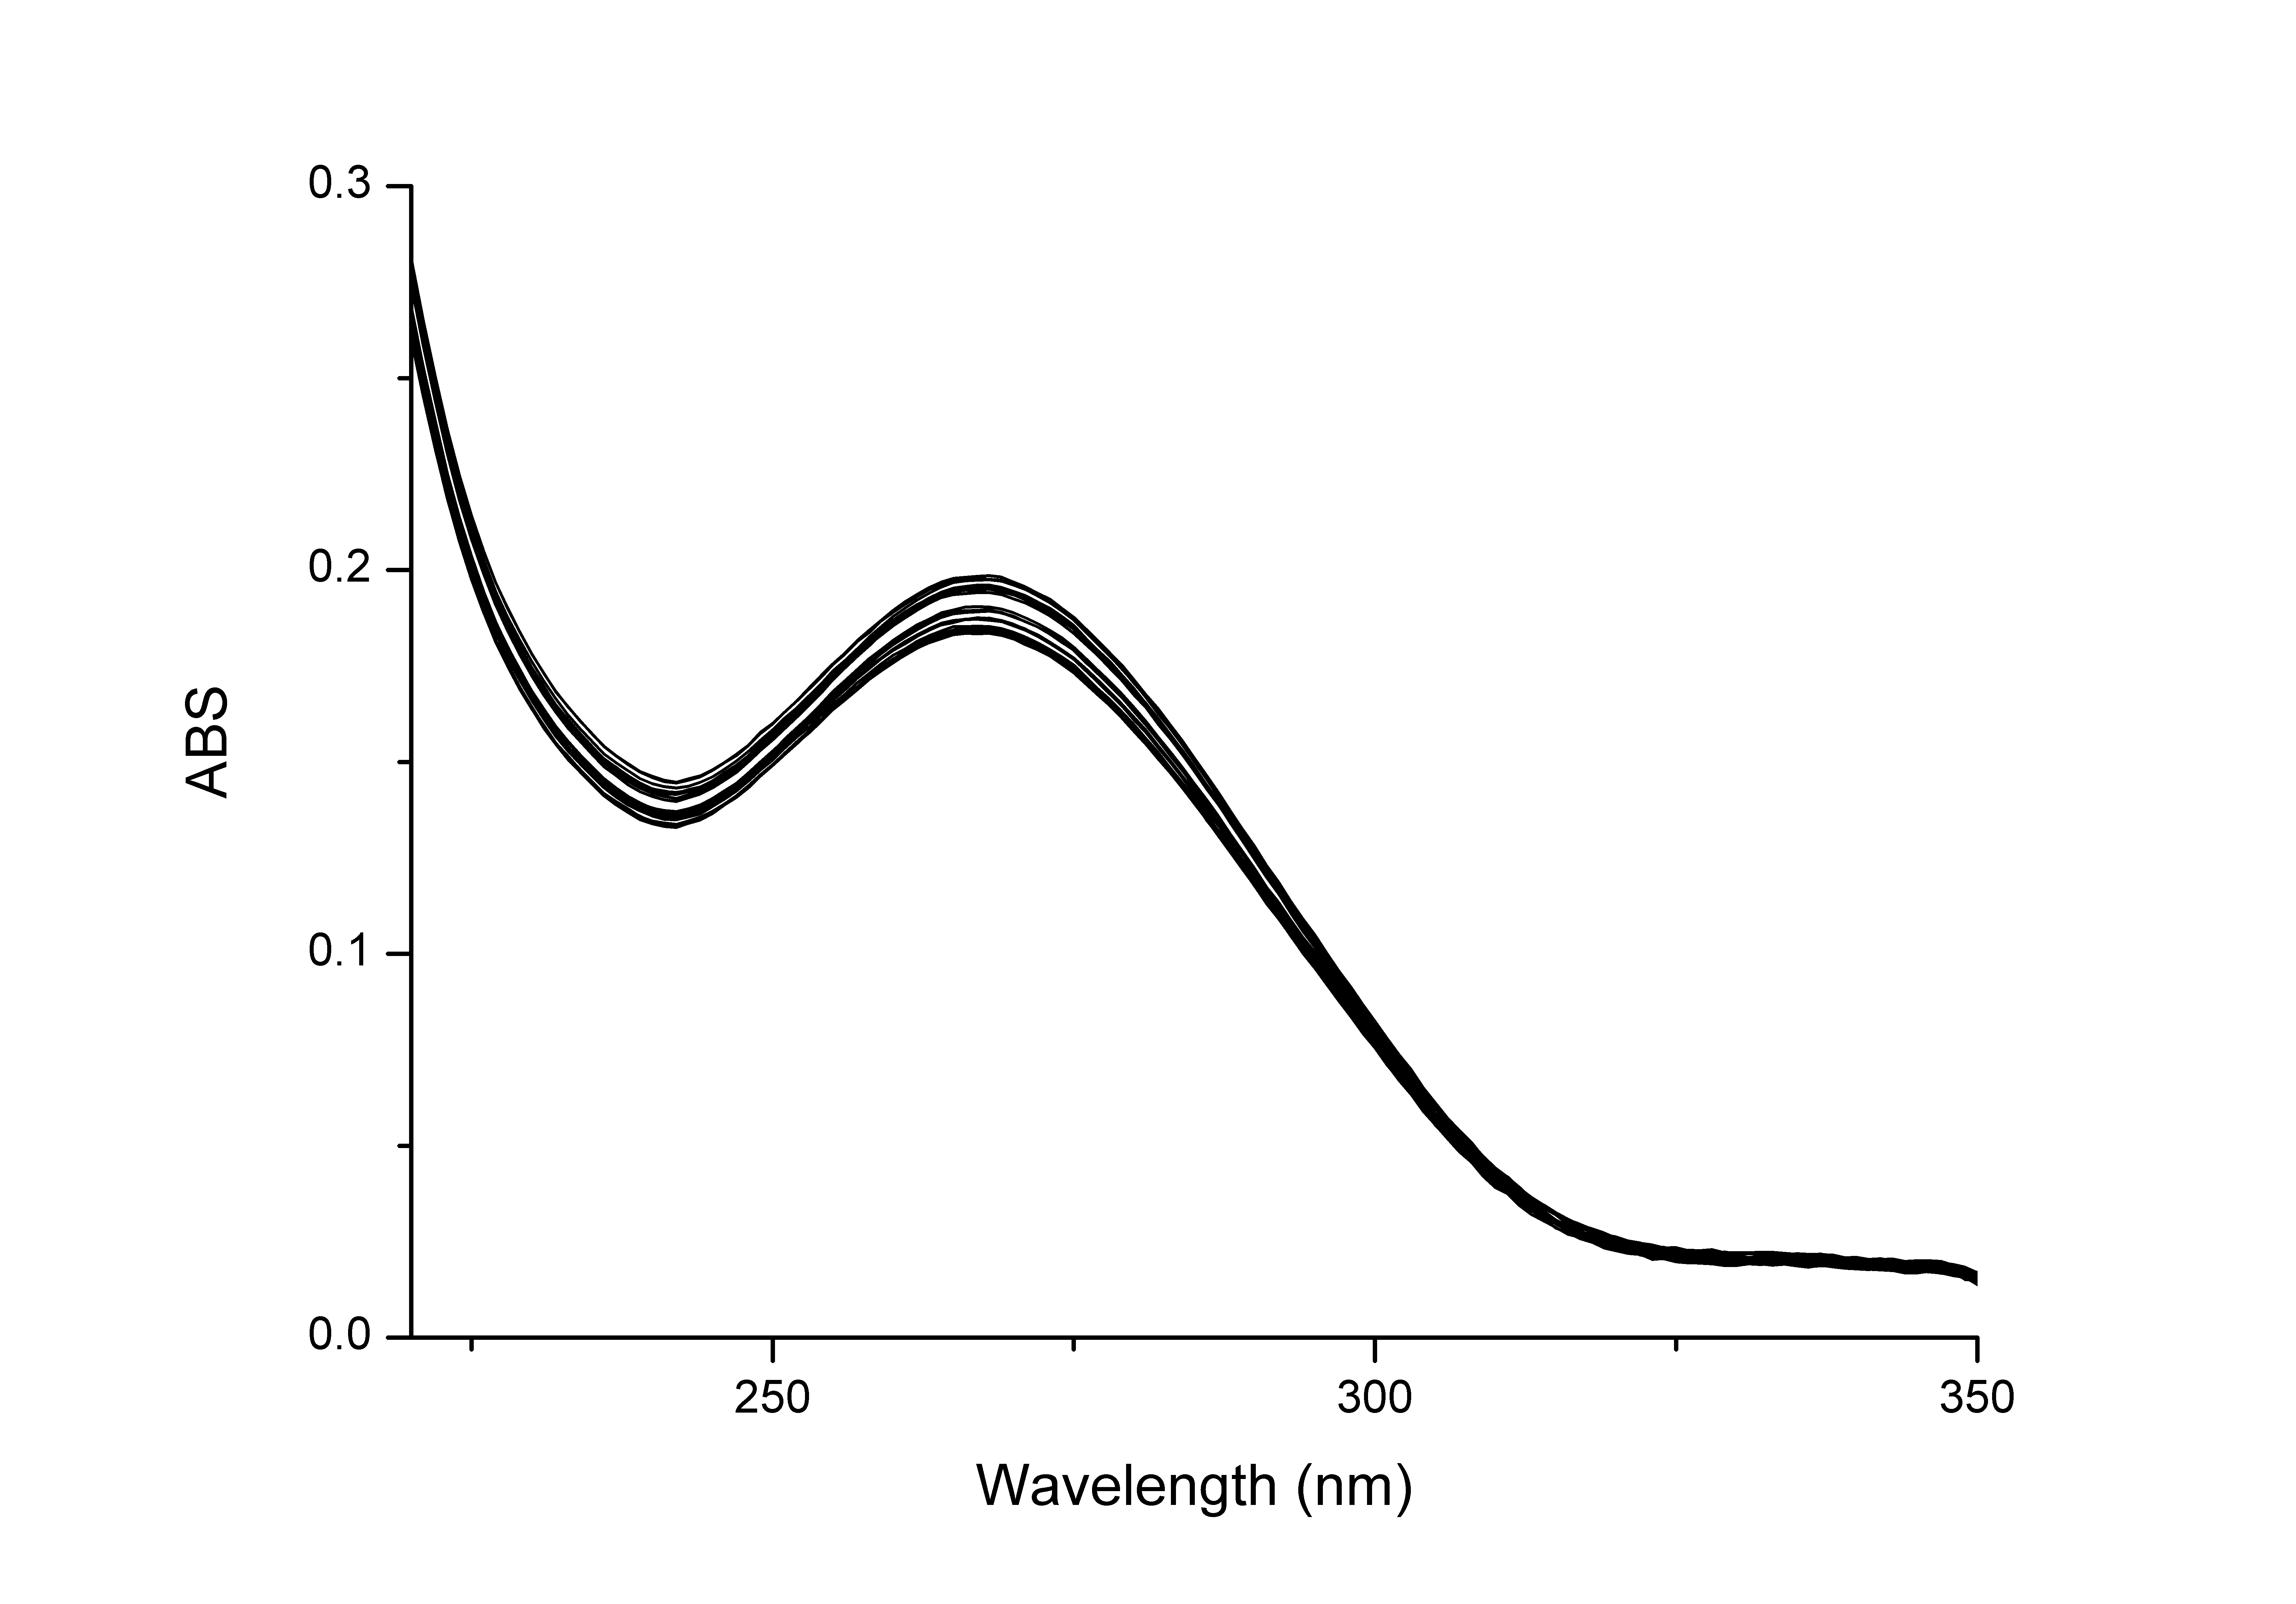


Figure S2. Absorption spectra of **L** registered in water/ethanol 99/1 v/v in the presence of HEPES buffer (10−3 mol dm−3) at pH = 7.0 by adding Cd(ClO4)2 up to 2 eq. ([L] = 1.5·10−5 mol dm−3)


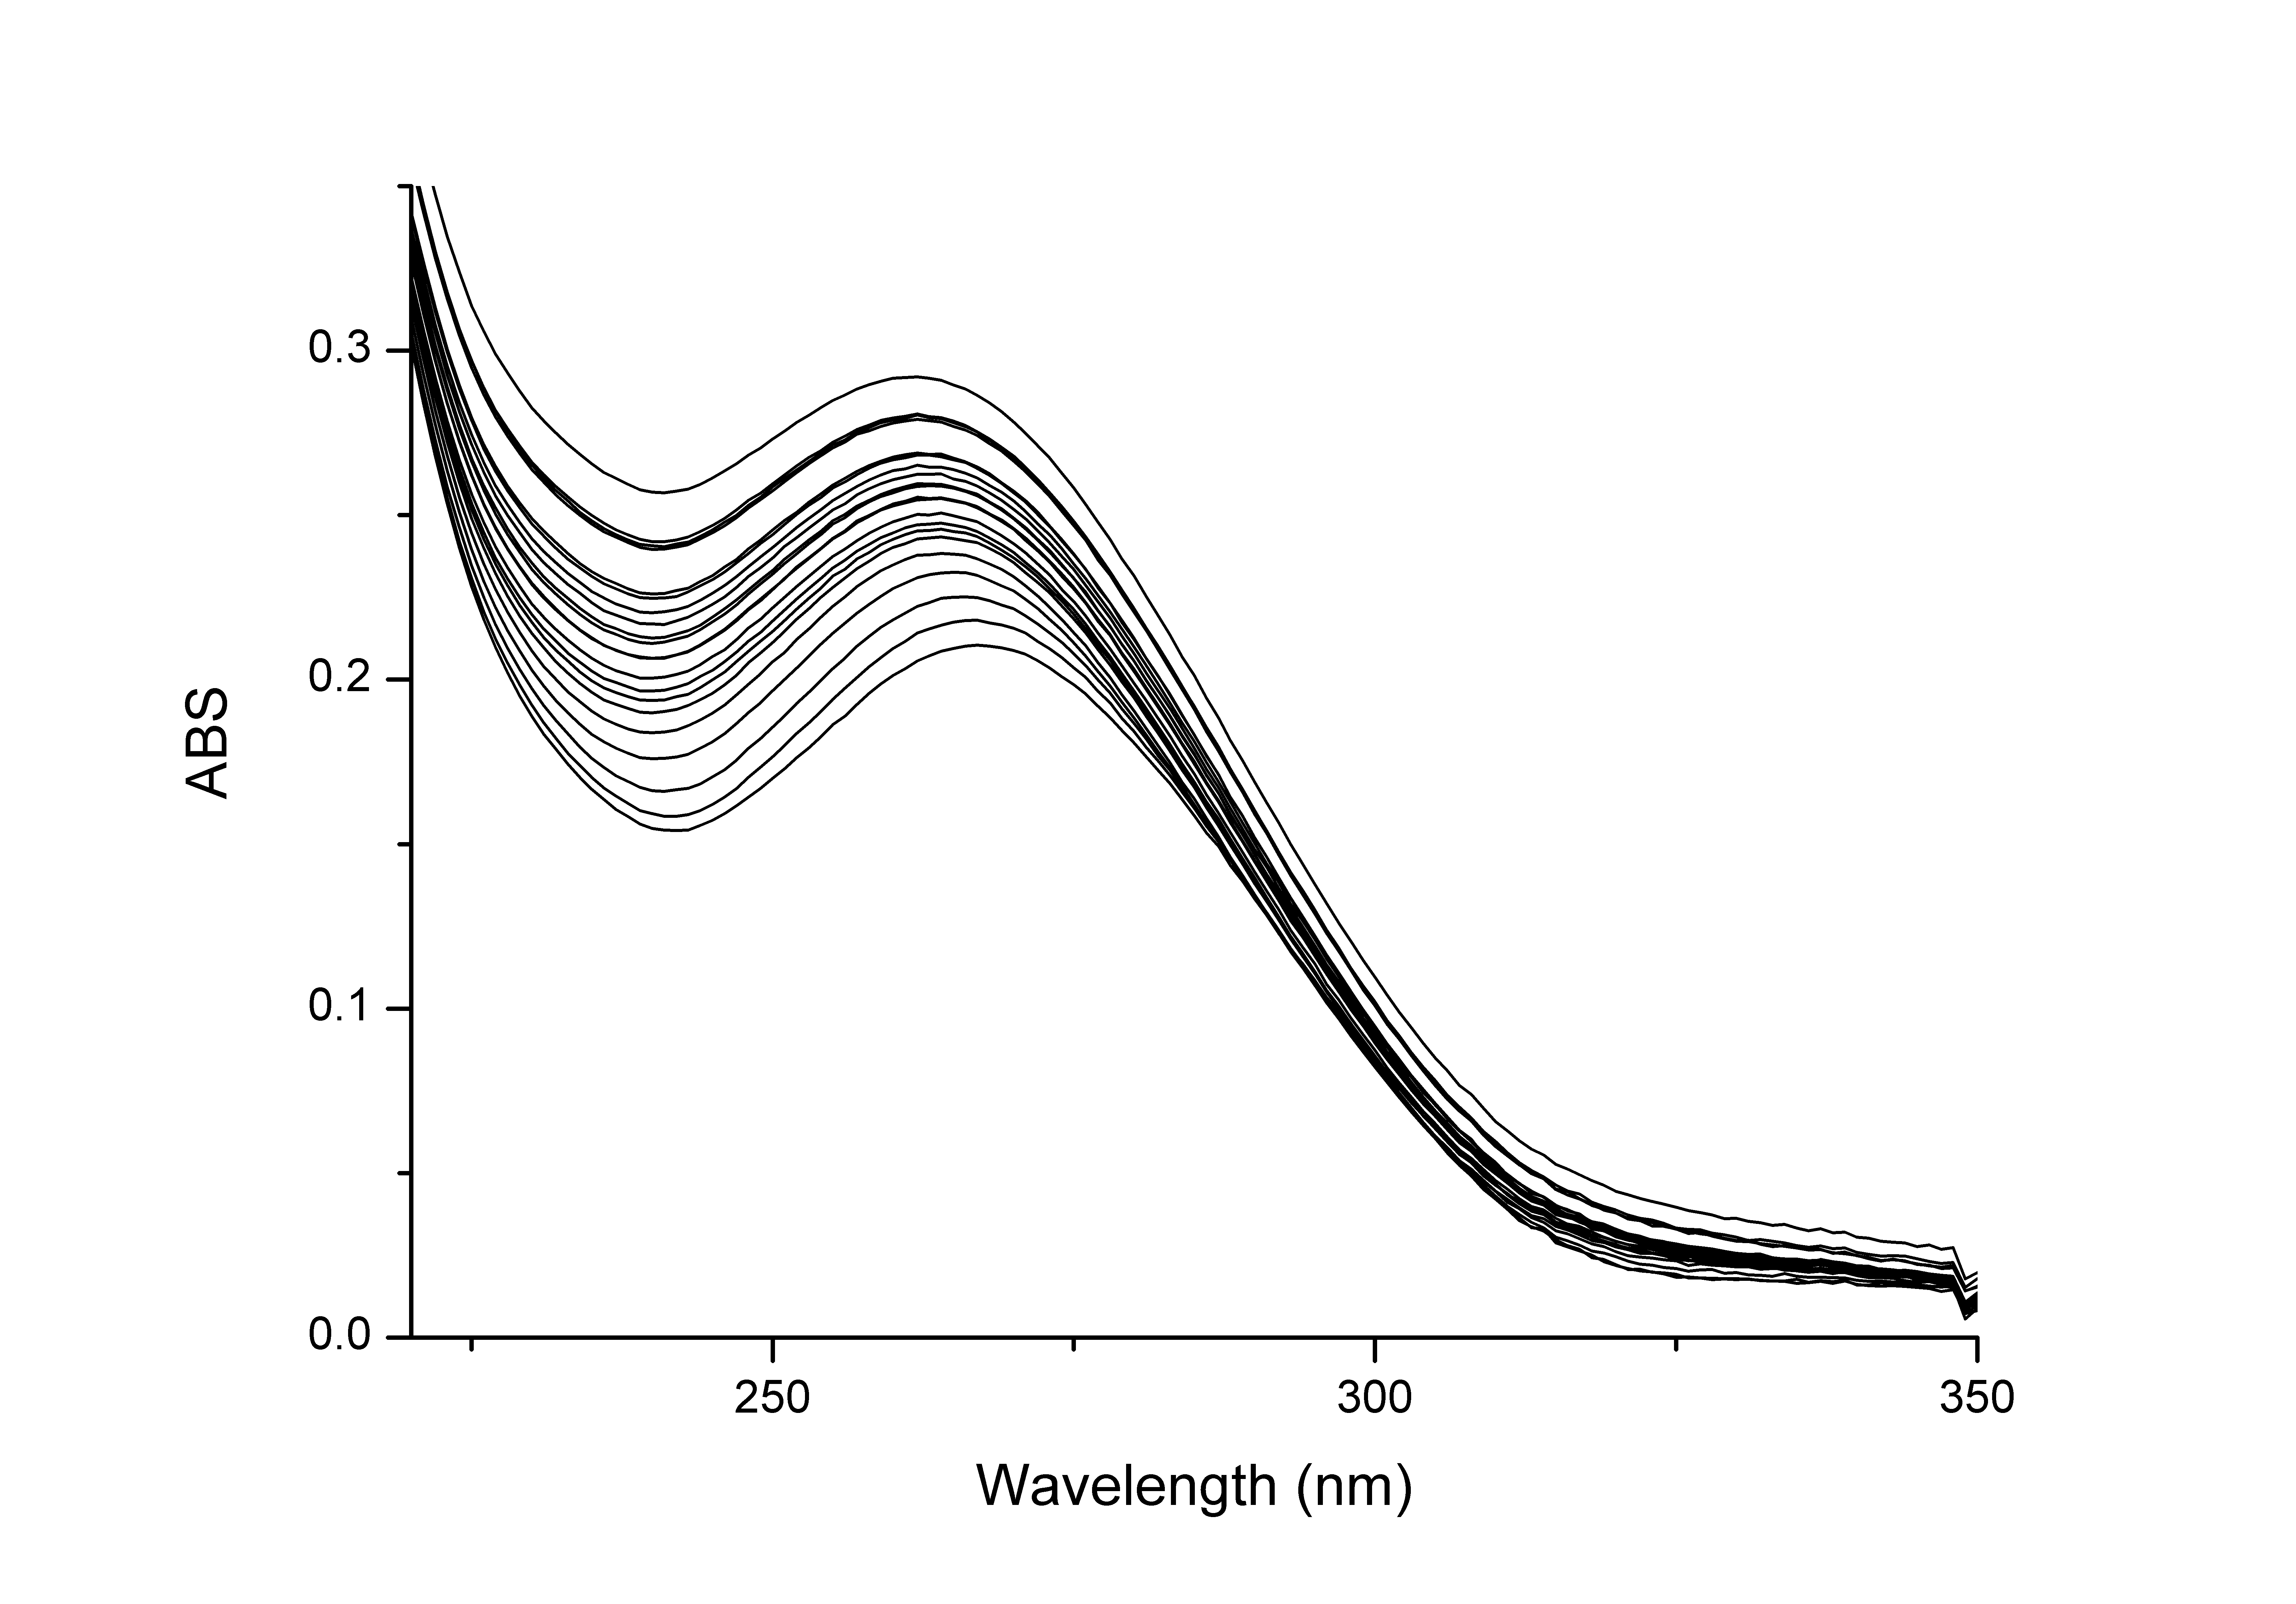


Figure S3. Absorption spectra of **L** registered in water/ethanol 99/1 v/v in the presence of HEPES buffer (10−3 mol dm−3) at pH = 7.0 by adding Cu(ClO4)2 up to 2 eq. ([L] = 1.5·10−5 mol dm−3)
